# Supplementary material
Source: HighWire-hosted journal article supplement (http://jpet.aspetjournals.org/highwire/filestream/136410/field_highwire_adjunct_files/1/JPET208595_SUPPLEMENTAL_DATA_2.pdf)

**Combined Analysis of Pharmacokinetic and Efficacy Data of Preclinical Studies with Statins Markedly Improves Translation of Drug Efficacy to Human Trials**

*E. van de Steeg, R. Kleemann, H.T. Jansen, W. van Duyvenvoorde, E.H. Offerman, H.M. Wortelboer and J. DeGroot*

**SUPPLEMENTAL DATA 2**

Determining ED<sub>30</sub> values (i.e. effective dose to reduce plasma TC with 30%) for the different statins in patients with hypercholesterolemia.

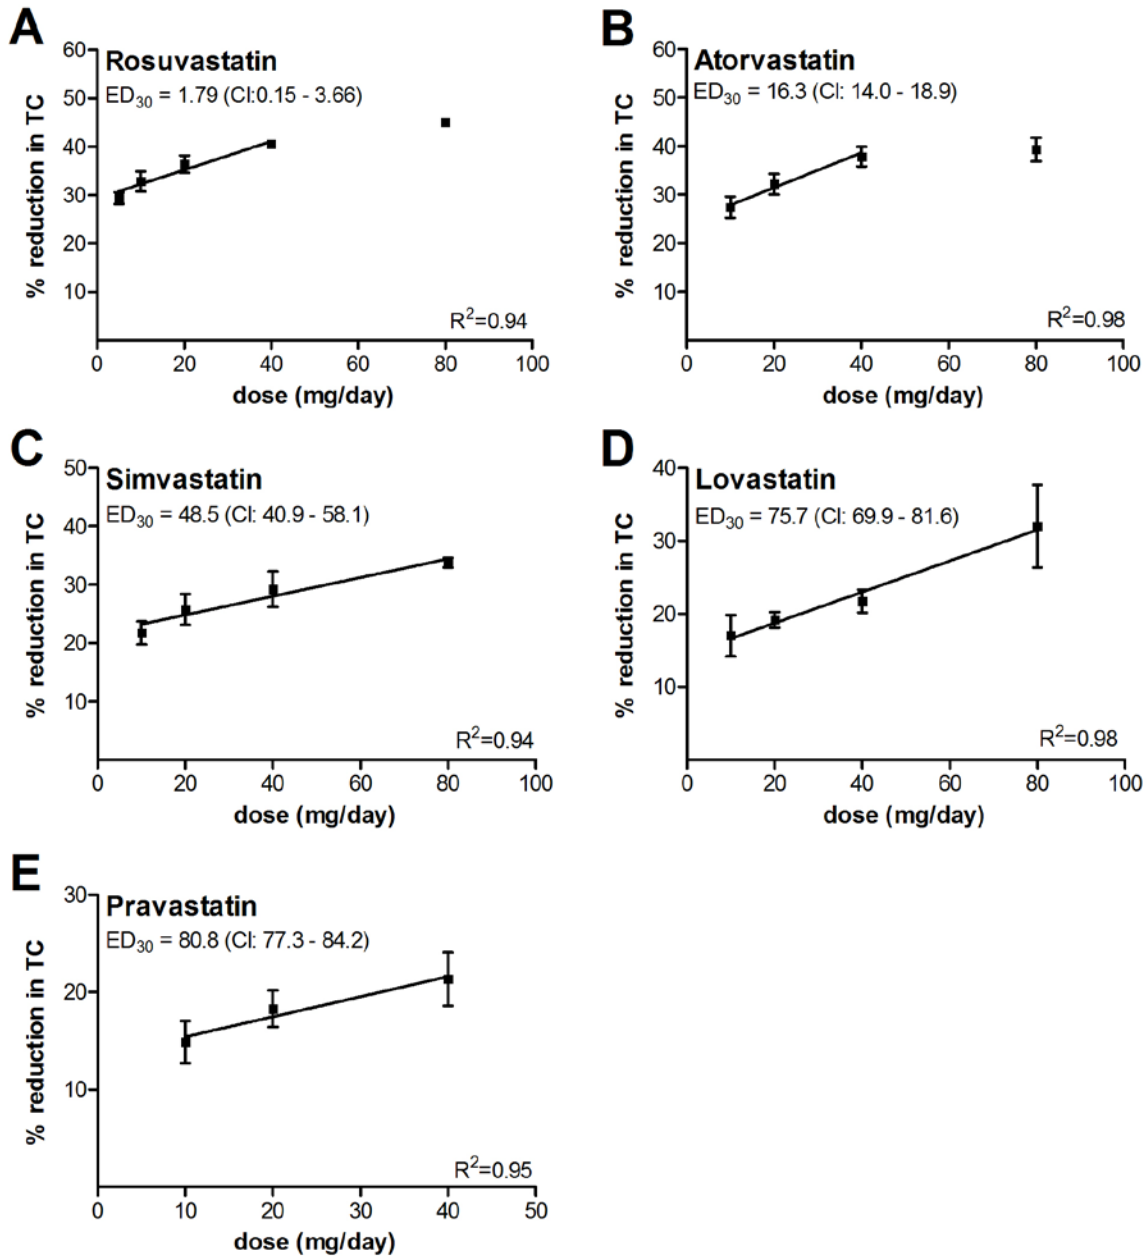

Supplement: JPET208595_SUPPLEMENTAL_DATA_2.pdf [file JPET208595_SUPPLEMENTAL_DATA_2.pdf]
